# Supplementary material
Source: PubMed Central journal article supplement (PMC3584889)
Supplement: IAI.00895-12_zii999090006so1.pdf [file IAI.00895-12_zii999090006so1.pdf]

## Supplemental Figure legends

### Supplemental Figure 1: Purity of isolated primary human NK cells

- a. Freshly isolated NK cells were gated with forward- and sideward scatter.
- b. Isolated human NK cells were stained with CD56- and CD3-specific antibodies. This representative dot blot indicates NK cell (CD56<sup>+</sup>CD3<sup>-</sup>) purity of 92.5% (gated on lymphocytes).
- c. CRACC protein expression on isolated NK cell surfaces.

### Supplemental Figure 2: TLR2/TLR4 ligation has no direct effect on CRACC expression of isolated NK cells

Incubation of isolated NK cells with TLR4-agonist LPS (**A**) or TLR2-agonist PGN (**B**) at different commonly used concentrations (24 hrs) did not induce changes in surface expression of CRACC protein. This suggests that CRACC upregulation is mediated indirectly by interaction with other immunocompetent cells. n=4; 1-way repeated-measures ANOVA with post-hoc Dunnett tests; n.s., not significant.
