# Supplementary material
Source: PubMed Central journal article supplement (PMC3584889)

**A**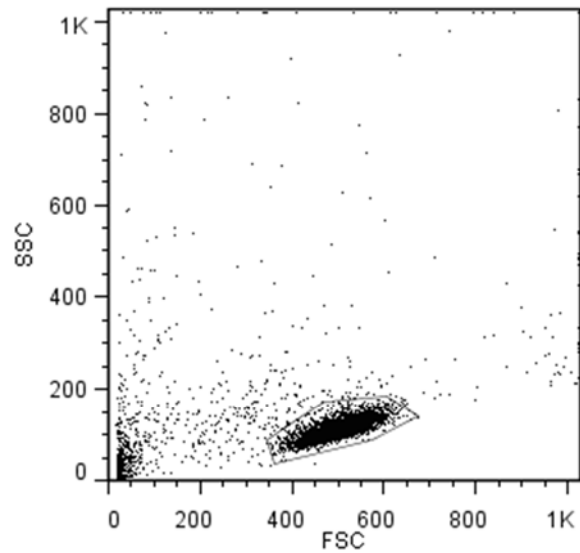**B**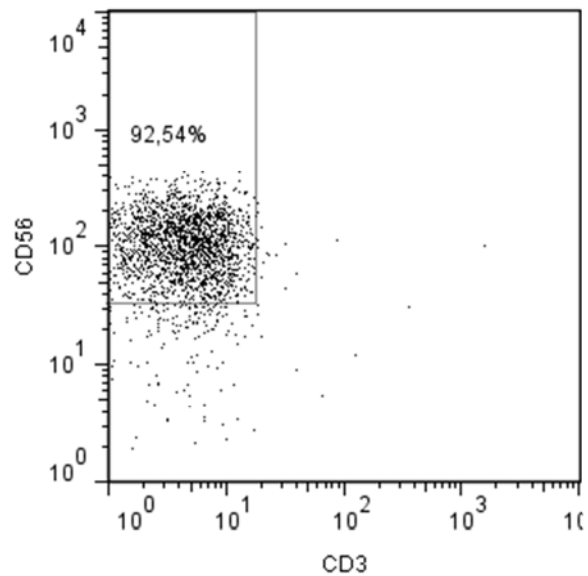**C**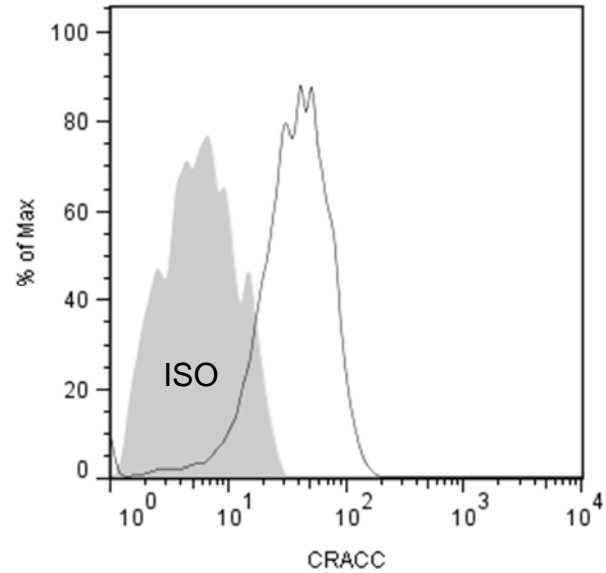

Supplement: IAI.00895-12_zii999090006so2.pdf [file IAI.00895-12_zii999090006so2.pdf]

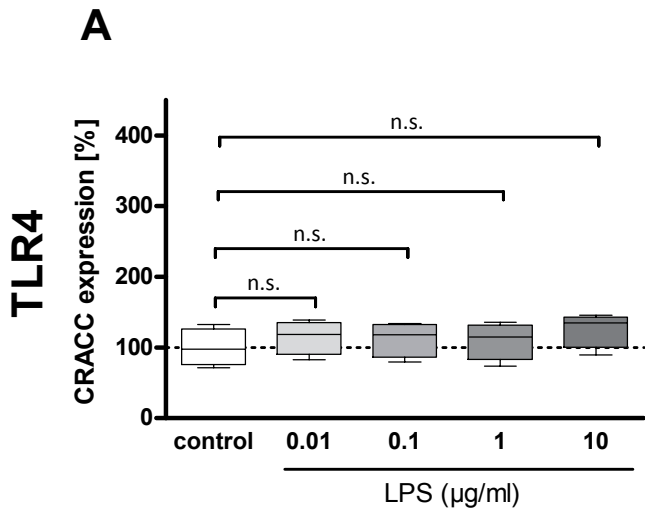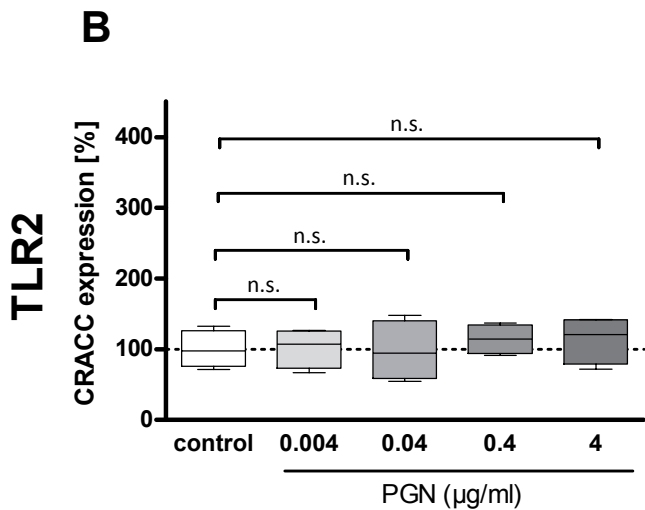

Supplement: IAI.00895-12_zii999090006so3.pdf [file IAI.00895-12_zii999090006so3.pdf]
